# Supplementary material for: Escape of SARS-CoV-2 501Y.V2 from neutralization by convalescent plasma
Source: Springer Nature journal article supplement (doi:10.1038/s41586-021-03471-w), 2021-03-29
Supplement: 41586_2021_3471_MOESM1_ESM.pdf [file 41586_2021_3471_MOESM1_ESM.pdf]

---

**Supplementary information**

---

**Escape of SARS-CoV-2 501Y.V2 from  
neutralization by convalescent plasma**

---

In the format provided by the  
authors and unedited

**Supplementary Table 1:** Mutation profile for the genomes of the outgrown viruses and for the infecting viruses of convalescent plasma donors

| Sequence ID                       | Accession ID*  | Cohort ID   | Date of collection | PANGO lineage† | Spike aa substitutions                                                                     | Spike deletions | Other aa substitutions                                                                                                                                             | Other deletions      |
|-----------------------------------|----------------|-------------|--------------------|----------------|--------------------------------------------------------------------------------------------|-----------------|--------------------------------------------------------------------------------------------------------------------------------------------------------------------|----------------------|
| <i>Outgrown viruses</i>           |                |             |                    |                |                                                                                            |                 |                                                                                                                                                                    |                      |
| K002868‡                          | EPI_ISL_602622 | 039-13-0013 | 02-Jul-2020        | B.1.1.117      | S: D614G<br>S: A688V                                                                       | -               | N: L319F<br>N: R203K<br>N: G204R<br>ORF14: G50N<br>ORF1a: D1481N<br>ORF1b: P314L                                                                                   | -                    |
| K005325                           | EPI_ISL_678615 | -           | 16-Nov-2020        | B.1.351        | S: L18F<br>S: D80A<br>S: D215G<br>S: K417N<br>S: E484K<br>S: N501Y<br>S: D614G<br>S: A701V | S: 242-244del   | E: P71L<br>N: T205I<br>ORF14: L52F<br>ORF1a: T265I<br>ORF1a: K1655N<br>ORF1a: K3353R<br>ORF1b: P314L<br>ORF3a: Q57H<br>ORF3a: W131L<br>ORF3a: S171L<br>ORF7a: V93F | ORF1ab: 3675-3677del |
| <i>Plasma donors (first wave)</i> |                |             |                    |                |                                                                                            |                 |                                                                                                                                                                    |                      |
| K003667                           | EPI_ISL_602623 | 039-02-0005 | 22-Jun-2020        | B.1.140        | S: D614G                                                                                   | -               | ORF1a: D75E<br>ORF1a: F741L<br>ORF1a: S2224F<br>ORF1b: P314L                                                                                                       | -                    |
| K004285                           | EPI_ISL_660167 | 039-13-0015 | 03-Jul-2020        | B.1            | S: D614G                                                                                   | -               | E: L73P<br>ORF1a: D3728N<br>ORF1b: P314L                                                                                                                           | -                    |
| K003673                           | EPI_ISL_602629 | 039-13-0018 | 06-Jul-2020        | B.1.1.84       | S: A653V<br>S: D614G                                                                       | -               | N: R203K<br>N: G204R<br>ORF1b: P314L<br>ORF14: G50R/E                                                                                                              | -                    |
| K003675                           | EPI_ISL_602631 | 039-02-0011 | 07-Jul-2020        | B.1.1.56       | S: D614G                                                                                   | -               | N: R203K<br>N: G204R<br>ORF1b: P314L<br>ORF1b: P970L<br>ORF14: G50R/E                                                                                              | -                    |
| K003668                           | EPI_ISL_602624 | 039-02-0013 | 10-Jul-2020        | B.1.1.117      | S: A688V                                                                                   | -               | N: L139F                                                                                                                                                           | -                    |

|         |                |             |             |           |                                  |   |                                                                                                  |   |
|---------|----------------|-------------|-------------|-----------|----------------------------------|---|--------------------------------------------------------------------------------------------------|---|
|         |                |             |             |           | S: D614G                         |   | N: R203K<br>N: G204R<br>ORF1b: P314L<br>ORF14: G50R/E                                            |   |
| K004289 | EPI_ISL_660170 | 039-02-0014 | 14-Jul-2020 | B.1.1.56  | S: D614G                         | - | E:L73P<br>N:R203K<br>N:G204R<br>ORF14:G50N<br>ORF1b:P314L<br>ORF1b:T1522I                        | - |
| K004293 | EPI_ISL_660174 | 039-13-0038 | 16-Jul-2020 | H.1       | S: D614G<br>S: Q677H             | - | N: R203K<br>N: G204R<br>ORF1a: P1497L<br>ORF1a: D3728N<br>ORF1b: P314L<br>ORF14: G50N            | - |
| K004291 | EPI_ISL_660172 | 039-13-0033 | 17-Jul-2020 | B.1       | S: D614G                         | - | N:T148A<br>ORF10:A28V<br>ORF1a:K2511R<br>ORF1a:V3858I<br>ORF1b:P314L                             | - |
| K004292 | EPI_ISL_660173 | 039-13-0037 | 24-Jul-2020 | B.1.1.117 | S: D614G<br>S: A688V<br>S: M731I | - | N: L139F<br>N: R203K<br>N: G204R<br>ORF3a: Q245K<br>ORF1b: P314L                                 | - |
| K004295 | EPI_ISL_660176 | 039-02-0017 | 28-Jul-2020 | B.1.140   | S: D614G                         | - | ORF1a:F1178S<br>ORF1b:P314L                                                                      | - |
| K004300 | EPI_ISL_660180 | 039-13-0060 | 17-Aug-2020 | B.1.1.56  | S:D614G                          | - | E: L73P<br>N: R203K<br>N: G204R<br>ORF1a: R2267G<br>ORF1b: P314L<br>ORF1b: A2589T<br>ORF14: G50N | - |
| K004302 | EPI_ISL_660181 | 039-13-0062 | 18-Aug-2020 | B.1.1.1   | S: D614G                         | - | N:R203K<br>N:G204R<br>ORF14:G50N<br>ORF1a:T1246I<br>ORF1a:G3278S<br>ORF1b:P314L                  | - |

|                                           |                 |             |             |          |                                                                                 |               |                                                                                                                                                       |                     |
|-------------------------------------------|-----------------|-------------|-------------|----------|---------------------------------------------------------------------------------|---------------|-------------------------------------------------------------------------------------------------------------------------------------------------------|---------------------|
| K004306                                   | EPI_ISL_660185  | 039-13-0103 | 05-Oct-2020 | B.1.1.56 | S: D614G<br>S: E484K                                                            | -             | N: R203K<br>N: G204R<br>ORF1a: H110Y<br>ORF1a: R2267G<br>ORF1a: V3718F<br>ORF1b: P314L<br>ORF9b: R13H<br>ORF14: G50N                                  | -                   |
| <b><i>Plasma donors (second wave)</i></b> |                 |             |             |          |                                                                                 |               |                                                                                                                                                       |                     |
| K008637                                   | EPI_ISL_1229368 | 039-02-0033 | 05-Jan-2021 | B.1.351  | S: D80A<br>S: K417N<br>S: E484K<br>S: N501Y<br>S: D614G<br>S: A701V             | S: 242-244del | E: P71L<br>N: T205I<br>ORF1a: T265I<br>ORF1a: K1655N<br>ORF1a: S2285F<br>ORF1a: K3353R<br>ORF1b: P314L<br>ORF3a: Q57H<br>ORF3a: S171L                 | ORF1a: 3675-3677del |
| K008633                                   | EPI_ISL_1229367 | 039-09-0001 | 11-Jan-2021 | B.1.351  | S: D80A<br>S: D215G<br>S: K417N<br>S: E484K<br>S: N501Y<br>S: D614G<br>S: A701V | S: 242-244del | E: P71L<br>N: T205I<br>ORF1a: T265I<br>ORF1a: V721I<br>ORF1a: S1612L<br>ORF1a: K1655N<br>ORF1a: K3353R<br>ORF1b: P314L<br>ORF3a: Q57H<br>ORF3a: S171L | ORF1a: 3675-3677del |

Amino acid mutation nomenclature includes open reading frame, wild-type amino acid, ORF position and amino-acid mutation (e.g. S:D80A, Spike D to A substitution at position 80). del refers to deletion between stated positions. Amino acid mutations are annotated based on mature protein region of coding sequence (CDS) of SARS-CoV-2 reference sequence NC\_045512.2.

\* Accession ID refers to GISAID EpiCoV™ database ([www.gisaid.org](http://www.gisaid.org))

† Lineage classification performed by Pangolin software application version v2.1.7 (<https://cov-lineages.org/pangolin.html>)

‡ Also plasma donor (first wave virus)
